1 **Novel effector genes revealed by the genomic analysis of the phytopathogenic fungus**  
2 ***Fusarium oxysporum* f. sp. *physali* (*Foph*) that infects cape gooseberry plants**

3  
4 **Jaime Simbaqueba<sup>1\*</sup>, Edwin A. Rodriguez<sup>1</sup>, Diana Burbano-David<sup>1</sup>, Carolina Gonzalez<sup>1</sup>, Alejandro Caro-**  
5 **Quintero<sup>2\*</sup>**

6  
7 <sup>1</sup>Corporación Colombiana de Investigación Agropecuaria – AGROSAVIA. Centro de Investigación Tibaitatá,  
8 Km 14 vía Mosquera, Cundinamarca, Colombia.

9 <sup>2</sup>Universidad Nacional de Colombia – Department of Biology, Bogotá, Colombia

10  
11 **\* Corresponding authors:**

12 Jaime Simbaqueba

13 [jsimbaqueba@gmail.com](mailto:jsimbaqueba@gmail.com)

14 Alejandro Caro-Quintero

15 [acarog@unal.edu.co](mailto:acarog@unal.edu.co)

16  
17 **Abstract**

18 The vascular wilt disease caused by the fungus *Fusarium oxysporum* f. sp. *physali* (*Foph*) is one of  
19 the most limiting factors for the production and export of cape gooseberry (*Physalis peruviana*) in  
20 Colombia. A previous study of the transcriptomic profile of a highly virulent strain of *F. oxysporum* in  
21 cape gooseberry plants, from a collection of 136 fungal isolates obtained from wilted cape  
22 gooseberry plants, revealed the presence of secreted in the xylem (SIX) effector genes, known to  
23 be involved in the pathogenicity of other *F. oxysporum* *formae speciales* (ff. spp.). This pathogenic  
24 strain was named *Foph*, due to its specificity for cape gooseberry hosts. Here, we sequenced the  
25 genome of *Foph*, using the Illumina MiSeq platform. We analyzed the assembled genome, focusing  
26 on the confirmation of the presence of homologues of SIX effectors and the identification of novel  
27 candidates of effector genes unique of *Foph*. By comparative and phylogenomic analyses based on  
28 single-copy orthologues, we identified that *Foph* is closely related to *F. oxysporum* ff. spp.,  
29 associated with solanaceous hosts. We confirmed the presence of highly identical homologous  
30 genomic regions between *Foph* and *Fol*, that contain effector genes and identified seven new  
31 effector gene candidates, specific to *Foph* strains. We also conducted a molecular characterization  
32 of a panel of 29 *F. oxysporum* additional stains associated to cape gooseberry crops isolated from  
33 different regions of Colombia. These results suggest the polyphyletic origin of *Foph* and the putative  
34 independent acquisition of new candidate effectors in different clades of related strains. The novel

35 effector candidates identified by sequencing and analyzing the genome of *Foph*, represent new  
36 sources involved in the interaction between *Foph* and cape gooseberry. These resources could be  
37 implemented to develop appropriate management strategies of the wilt disease caused by *Foph* in  
38 the cape gooseberry crop.

39

#### 40 **Keywords:**

41

42 ***Fusarium oxysporum* f. sp. *physali* (*Foph*), Cape gooseberry, Effector genes, Pathogenicity, Vascular**  
43 **wilt disease**

44

#### 45 **Introduction**

46

47 *Fusarium oxysporum* is a cosmopolitan ascomycete fungus that commonly inhabits agricultural  
48 soils. Rather than a single species, it is a species complex of non-pathogenic, plant pathogenic, and  
49 human pathogenic strains, termed the *Fusarium oxysporum* species complex (FOSC) (Di Pietro et  
50 al., 2003; Michielse and Rep 2009; O'Donnell et al. 2009; Ma et al., 2013, Ma, 2014). Several  
51 hundred different members of the FOSC are able to penetrate plant roots, colonise xylem vessels  
52 and produce vascular wilt diseases in a broad range of host plants, including economically important  
53 crops such as banana, cotton, date palm, onion, brassicas, cucurbits, legumes and solanaceous  
54 species, such as tomato, eggplant, chilli and cape gooseberry, but not grasses (Michielse and Rep,  
55 2009). However, individual pathogenic isolates of *Fusarium oxysporum* are highly host specific and  
56 have therefore been classified into different *formae speciales* (ff. spp.) according to the host they  
57 infect e.g. strains that infect banana cannot infect tomato plants and vice versa (Lievens et al., 2008;  
58 Michielse and Rep 2009; Ma, 2014). *F. oxysporum* has no known sexual stage and the mechanism  
59 for species diversification has been associated with the parasexual cycle through heterokaryon  
60 formation, which enables a mitotic genetic exchange between different nuclei (Glass et al., 2000; Di  
61 Pietro et al., 2003).

62 Comparative genomics of phytopathogens in the genus *Fusarium* (i.e. *F. graminearum*, *F.*  
63 *verticillioides* and *F. oxysporum* f. sp. *lycopersici* [*Fol*]), revealed the presence of lineage specific  
64 (LS) chromosomes and chromosomal regions in *Fol* that were rich in repetitive elements and  
65 contained genes encoding known or putative effector proteins (Ma et al., 2010). Among them, 14  
66 genes were identified that encode small proteins secreted into the xylem sap of tomato plants  
67 infected with *Fol* (called SIX proteins) (Houterman et al., 2007; Schmidt et al., 2013). Three of these

68 SIX genes are avirulence genes (*Avr*), with resistance (*R*) gene counterparts identified in tomato  
69 (Simons et al., 1998; Rep et al., 2004; Houterman et al., 2008, 2009; Catanzariti et al., 2015, 2017).

70 Small proteins secreted by a broad range of plant pathogens, including bacteria, fungi, oomycetes  
71 and nematodes, that interfere with the cellular structure and function of their hosts are known as  
72 effector proteins (Kamoun, 2006, 2007; Hogenhout et al., 2009). The low level of homology among  
73 fungal effectors makes it difficult to identify common features that allow their classification as a  
74 group or protein family (Stergiopoulos and de Wit, 2009; Lo Presti et al., 2015; Guillen et al., 2015).  
75 Nevertheless, many fungal effectors have been identified based on the presence of a signal peptide  
76 sequence for secretion, small size of around 300 amino acids or less, and the fact that they are  
77 often cysteine rich (Sperschneider et al., 2015). A large-scale search for putative effector genes in  
78 59 strains of various ff. spp., resulted in a set of 104 candidate effectors including the 14 secreted in  
79 the xylem (SIX) genes, identified in *Fol* (Ma et al., 2010; Schmidt et al., 2013; van Dam et al., 2016).  
80 From this candidate effector repertoire, strains were classified according to the putative effector  
81 sequences they shared. Interestingly, all the cucurbit-infecting ff. spp. (*melonis*, *niveum*,  
82 *cucumerinum* and *radicis-cucumerinum*), were grouped together in a separate supercluster, sharing  
83 an overlapping set of putative effectors and possibly conferring the ability to those ff. spp. to infect  
84 cucurbit host species (van Dam et al., 2016). This supercluster includes a substantial overlap with  
85 *SIX1*, *SIX6*, *SIX8*, *SIX9*, *SIX11* and *SIX13* and largely excluded *SIX2*, *SIX3*, *SIX4*, *SIX5*, *SIX7*,  
86 *SIX10*, *SIX12* and *SIX14*. Homologues of *Fol* SIX genes have been identified in alliaceous, legumes,  
87 musaceous, solanaceous and narcissus infecting ff. spp. of *F. oxysporum* (Taylor et al., 2016 and  
88 2019; Williams et al., 2016; Czislowski et al., 2018; Simbaqueba et al., 2018).

89 Cape gooseberry (*Physalis peruviana*) from the Solanaceae family, is a tropical native fruit of South  
90 America found typically growing in the Andes. In Colombia, over the last three decades, the cape  
91 gooseberry has been transformed from a wild and under-utilized species to an important exotic fruit  
92 for national and international markets and represents one of the most exported fruit for Colombia  
93 (Simbaqueba et al., 2011; Moreno-Velandia et al., 2019). The cape gooseberry is also appreciated  
94 by its nutritional and medicinal properties (Yen et al., 2010; Ramadan 2011, 2015; El-Gengaihi et al.,  
95 2013). However, despite its significant value, cape gooseberry production has been limited due to  
96 the lack of known cultivars and the absence of adequate phytosanitary measures. One of the most  
97 important disease problems in cape gooseberry is the vascular wilt disease caused by *Fusarium*  
98 *oxysporum*. This disease was first described in 2005 and has become one of the limiting factors for  
99 cape gooseberry production and export (Moreno-Velandia et al., 2018). Field observations indicated  
100 typical symptoms of a vascular wilt disease with an incidence ranging from 10 to 50% with losses in

101 production of 90% approximately (unofficially reported), in the Cundinamarca central region of  
102 Colombia. Consequently, producers moved to other places in the same region, spreading  
103 contaminated plant material and seeds (Barrero et al., 2012).

104 From 2012 to 2015, a total of 136 fungal isolates were obtained from cape gooseberry plants  
105 showing wilting disease symptoms, collected from different locations of the central Andean Region  
106 of Colombia. The fungal isolates were described as *F. oxysporum*, using Koch postulates and  
107 molecular markers for intergenic spacers (IGS) and the Translation Elongation Factor 1 Alpha gene  
108 (EF1 $\alpha$ ) of *F. oxysporum* (AGROSAVIA, Unpublished results). From the *F. oxysporum* strains, one  
109 (named MAP5), was found to be highly virulent on a commercial variety of cape gooseberry and  
110 different accessions from National Germplasm Bank and different collections (Enciso-Rodriguez et  
111 al., 2013; Osorio-Guarin et al., 2016). Further RNAseq analysis was performed to study differential  
112 gene expression comparing susceptible and resistant cape gooseberry plants inoculated with MAP5  
113 (AGROSAVIA, Unpublished results). This RNAseq data was used in comparative transcriptomics,  
114 identifying eight homologues of effector genes between *Fol* and MAP5. Thus, describing a newly  
115 forma specialis of *Fusarium oxysporum* that affect cape gooseberry plants, designated as *F.*  
116 *oxysporum* f. sp. *physali* (*Foph*) (Simbaqueba et al., 2018).

117 In this study, we sequenced the genome of *Foph* and performed comparative genomics using the  
118 resulted genome assembly to infer the phylogenetic relationship of *Foph* within the *F. oxysporum*  
119 clade. This result showed the polyphyletic origin of *Foph* and the closer relationship with ff. spp.  
120 related to *Solanaceous* hosts. We also identified putative LS genomic regions in *Foph* that could be  
121 related with pathogenicity and host specificity, as they contain the homologous effectors previously  
122 reported and eight new effector candidates identified in this study. We mapped the *Foph* RNAseq  
123 dataset previously reported against the candidate effectors and identified that these novel effectors  
124 are expressed during host infection. These results indicate that the new candidate effectors, could  
125 have a putative role in virulence. Additionally, we tested the presence of the novel effectors by PCR  
126 amplification in a panel of 36 *F. oxysporum* isolates (including MAP5), associated to the cape  
127 gooseberry crop and identified that the presence of novel candidates was unique to *Foph* related  
128 strains, suggesting host specificity towards cape gooseberry plants. Furthermore, we conducted a  
129 phylogenetic analysis using the EF1a sequences available for this panel of *F. oxysporum* isolates.  
130 This result reflects the polyphyletic origin of *Foph* and suggests the independent acquisition of the  
131 candidate effectors in at least two divergent clades of *Foph* related strains.

## 132 **Materials and Methods**

### 133 **DNA extraction**

134 *F. oxysporum* strains were reactivated in PDA media and incubated at 28 °C for eight days or until  
135 enough biomass was obtained for DNA extraction. The DNA of MAP5 strain (*Foph*), used for  
136 genome sequencing, was obtained using the ZR Fungal / Bacterial DNA kit from Zymo research®,  
137 according to the protocol proposed by the manufacturer. The DNA of the remaining *F. oxysporum*  
138 isolates used in this study, was extracted from 100 mg of the mycelia, using the  
139 cetyltrimethylammonium bromide (CTAB) protocol modified for fungal DNA (Zhang et al., 2010). The  
140 quality and DNA concentration using both methodologies were verified in 1% agarose gel using the  
141 1Kb Plus DNA Ladder (Invitrogen®) and also by Nanodrop DNA/RNA Quantification system.

### 142 ***Foph* genome sequencing and assembly**

143 Libraries of the virulent strain MAP5 of *Foph*, were generated from purified DNA with the Illumina  
144 Nextera XT DNA Sample Preparation Kit (San Diego, California, USA). The resulted libraries were  
145 verified in the Bioanalyzer Agilent 2100, using a DNA-HS chip and adjusted to a final concentration  
146 of 10 nM. Libraries were then amplified. The sequencing of the libraries was performed using the  
147 TruSeq PE Cluster V2 (Illumina, San Diego CA) kit generating 250bp pair-end reads in the Illumina  
148 MiSeq platform (San Diego, California, USA) at the Genetics and Antimicrobe Resistance Unit of El  
149 Bosque University.

150 The quality of the reads produced was verified with the software FastQC (Andrews S, 2015), and  
151 reads were trimmed using the software Trimmomatic (Bolger et al., 2014), with the following  
152 parameters “LEADING:3 TRAILING:3 SLIDINGWINDOW:4:15 MINLEN:45”. Additionally, adaptor  
153 sequences and reads less than 25 bp in length were filtered and removed using the scripts  
154 `fastq_quality_trimmer` and `fastq_quality_filter` of the FASTX-toolkit platform  
155 ([hannonlab.cshl.edu/fastx\\_toolkit](http://hannonlab.cshl.edu/fastx_toolkit)). A primary *de novo* assembly was performed with the pair-end  
156 reads overlapped into contigs, using the software Newbler v 2.0.01.14. (454 Life Sciences), Velvet  
157 (Zerbino & Birney, 2008), and SPAdes, v 3.5.0. (Illumina, San Diego CA). The Quality Assessment  
158 Tool for Genome Assemblies (QUAST) software (Gurevich et al., 2013), was used to determine the  
159 best genome assembly based on the highest N50 parameter.

### 160 **Gene prediction and annotation**

161 *Ab initio* gene models for the genome sequence of *Foph*, were predicted using the software  
162 Augustus (Stanke & Morgenstern, 2005), using the gene prediction model for *FoI4287*, as species  
163 gene model with the following parameters “--strand=both” and “--uniqueGenelnd=true”, other  
164 parameters were used with the default settings. The resulted transcripts were annotated by

165 combining predictions using the software HMMER 3.0 (Finn et al., 2011), with the PFAM protein  
166 database. The functional annotation of the transcripts was performed with the software eggNOG-  
167 mapper v4.5.1 (Huerta-Cepas et al., 2017). Gene models were corroborated with the *Foph in planta*  
168 RNAseq database reported in our previous study.

### 169 **Comparative genomics analysis**

170 The comparative genomic analysis was carried out to establish the gene composition similarity and  
171 conserved patterns within phylogenetic clusters of 22 genomes of different *F. oxysporum* ff. spp.  
172 (including *Foph*), and the genome sequence of *F. fujikuroi* (Supplementary table S1). To identify  
173 these gene clusters, we used the anvi'o software (Eren et al., 2015), following the pangenomic  
174 workflow described before (Delmont & Eren, 2018). In brief, this pipeline generates a genome  
175 database that stores the DNA and amino acid sequences information of all genomes. Gene clusters  
176 were identified by calculating the similarities of each amino acid sequence in every genome against  
177 every other amino acid sequence using blastp (Altschul et al., 1990) and finally a hierarchical  
178 clustering was performed using the Euclidean distance and Ward clustering algorithm. The  
179 distribution of these gene clusters across the genomes was plotted using the anvi'o visualization  
180 tool. To reconstruct the phylogenetic relationship of these genomes, the single copy orthologous  
181 genes (SCG) were extracted from the pangenome database for all genomes, and a phylogenomic  
182 tree was generated using the FastTree 2.1 software (Price, et al., 2010) as a component of the  
183 anvi'o pipeline. To root the tree, we used the genome sequence of *F. fujikoroii* as outgroup  
184 (Supplementary table S1).

### 185 **Identification of effector genes in *Foph***

186 To validate the presence of homologous effectors (i.e. SIX, Ave1 and FOXM\_16303), identified in  
187 our previous *Foph* transcriptomic analysis, we carried out two search strategies of the homologue  
188 effectors in a database that included the 22 genome sequences of the ff. spp. of *F. oxysporum* used  
189 for comparative genomics of *Foph*. The first strategy consisted in a tBlastn search. The hits with an  
190 e-value <0.0001 and identity higher than 50%, in the 50% of the length of the sequence query, were  
191 selected for further analysis. In the second strategy, a Blastx search was performed to identify all  
192 possible putative peptides of the homologous effectors in the *F. oxysporum* genome database. The  
193 best hits with an e-value <0.0001 were selected for further analysis (Table 2).

194 To identify *de novo* candidate effector genes in *Foph*, the secretome and effectorome were  
195 predicted from the proteome of *Foph*, using the software SignalP v5.0 (Almagro-Armenteros et al.,  
196 2019) and EffectorP v2.0 (Sperschneider et al., 2018), respectively. In order to discard homologous



197 sequences in other *ff. spp.*, The two BLAST search strategies mentioned above were performed  
198 using the protein sequences positive for signal peptide and effector structure (i.e. <300 aa in length  
199 and cysteine rich) as a query. An additional search of Miniature Impala Transposable Elements  
200 (*mimp*) was performed in the UTR of the transcripts predicted of *Foph*, with the regular expression  
201 'NNCAGT[GA][GA]G[GAT][TGC]GCAA[TAG]AA', using a customised Perl script as described by  
202 Schmidt et al, (2013) and van Dam and Rep, (2017), to determine whether or not the novel  
203 candidate could correspond to SIX type genes.

#### 204 **Molecular characterization of *Foph* isolates and PCR analysis of candidate effectors**

205 A panel of 36 *F. oxysporum* isolates (including the highly virulent *Foph*), derived from a collection of  
206 136 fungal isolates obtained from cape gooseberry crops, were selected based on their ability to  
207 cause wilting symptoms on susceptible cape gooseberry plants (Supplementary Table S2). The  
208 *EF1a* gene of *Fol* (GenBank XM\_018381269), was used as a molecular marker to characterize the  
209 *Foph* isolates to species level. EF1a sequences for seven out of 36 isolates (including MAP5), were  
210 obtained from the GenBank (Supplementary Table S2). For the remaining 29 isolates, a fragment of  
211 the EF1a gene was amplified and sequenced using the primers reported by Imazaki et al, (2015).  
212 PCR reactions were conducted with Taq DNA Polymerase (Invitrogen™, Carlsbad, CA, USA), in a  
213 25 µL reaction volume. The PCR reaction consisted of 0.25 µL Taq Polymerase, 2.5 µL of 10X  
214 buffer (Invitrogen™, Carlsbad, CA, USA), 0.16 µM of each primer, 0.16 mM of dNTP mix, 2 mM  
215 MgCl<sub>2</sub> and 25 ng of template DNA. PCRs were carried out with an initial denaturing step at 95°C for  
216 2 min followed by 30 cycles of denaturing at 95°C for 45 sec, annealing of primers at 59°C (62°C for  
217 *Fol*\_155.3) for 45 sec and primer extension at 72°C for 45 sec. The PCR was completed by a final  
218 extension at 72°C for 10 min. PCR products were purified using a QIAquick PCR Purification Kit  
219 (Qiagen) and then sequenced by Sanger platform.

220 EF1a sequences obtained from 22 out 36 of *Foph* related isolates, were submitted to the GenBank  
221 with accession numbers (MT738937-MT738958). A total of 29 EF1a sequences of *Foph* related  
222 strains were aligned (MUSCLE method) using MEGA version 7 (Kumar et al., 2016). The  
223 corresponding EF1a sequence from the selected *F. oxysporum ff. spp.* mentioned above, were also  
224 included for comparison. Phylogenetic analysis was performed using the software BEAST (Bayesian  
225 Evolutionary Analysis Sampling Trees) v 2.6.1 (Bouckaert et al., 2019), with default settings. The  
226 resulting phylogenetic trees were visualized using the Interactive Tree of Life (iTOL) v4 (Letunic and  
227 Bork, 2019). The EF1a from *F. fujikuroi* was used as an outgroup. To corroborate the presence of  
228 the new effectors in the *Foph* related strains, specific primers for the new candidates were designed  
229 and used for PCR amplification (Supplementary Table S3), using the same conditions as mentioned

230 above. DNA from Colombian strains of *Fol*, *Foc* R1 and TR4, were provided by Dr Mauricio Soto  
231 (AGROSAVIA), and used as a control for amplification.

## 232 **Results**

### 233 ***Foph* genome sequencing and assembly**

234 The genome sequence of the highly virulent strain of *Foph* (MAP5) in cape gooseberry was  
235 assembled from 250 bp paired end reads Illumina MiSeq into 1856 contigs with a total size of 44.9  
236 Mb. This genome assembly is smaller, compared to the reference genomes of different *ff. spp* of *F.*  
237 *oxysporum* (ranging from 47 to 61 Mb approximately), specific for *Solanaceous* and *Alliaceus*  
238 hosts, other Illumina genome assemblies available for strains grouped in the f. sp. named *Fophy*,  
239 that infect other *Physalis* host species (i.e. husk tomato or *P. philadelphica*), and two strains that  
240 infect tobacco (*Fonic\_003*) and eggplant (*Fome1\_001*) respectively. (Ma et al., 2010; van Dam et al.,  
241 2016, 2017; Armitage et al., 2018). Despite its fragmentation, the predicted gene content of this  
242 genome assembly of *Foph* (15019 transcripts), is similar to the illumina genome assemblies  
243 available in the GenBank (Table 1, Supplementary Table S1).

### 244 **Comparative genomics of *Foph***

245 A total of 14897 transcripts were predicted from the genome assembly of *Foph*, from which 14140  
246 have an orthologous counterpart in the genomes of *F. oxysporum* compared in this study (Table 1).  
247 Using the anvi'o pipeline for pangenome analysis, a set of the single copy orthologous genes (SCG)  
248 present in the 22 *F. oxysporum* genomes were extracted to reconstruct their phylogenetic  
249 relationship. We used this phylogenetic reconstruction to test whether *Foph* could be related to  
250 *Fophy* (i.e. *Physalis* infecting strains) or might be grouped in a lineage of strains that infect  
251 *Solanaceous* hosts. The resulted phylogenomic tree showed that *Foph* shared the same clade with  
252 *Fonic* and *Fol\_R3* and is closely related to *For1* and *Fo47* (both strains associated to the tomato  
253 crop). Nevertheless, no closer relationship was found between *Physalis* infecting *ff. spp.* (*Foph* and  
254 *Fophy*), indicating their polyphyletic origin and different host specificity (Figure 1a). We also  
255 performed a comparative analysis using the SCG shared between *Foph* and the remaining 21  
256 genomes of *F. oxysporum ff. spp.* As expected, this analysis showed that the majority of *Foph* SCG  
257 (~14K), are syntenic with the core chromosomes of *Fol* (used here as the reference genome  
258 sequence of *F. oxysporum* species). These syntenic SCG might correspond to the core genome of  
259 *Foph*, while the remaining ~0.5K of *Foph* SCG, correspond to transcripts that are not present in any  
260 cluster and could be part of the LS genomic regions (Figure 1b).

### 261 **The homologous effectors are confirmed in the genome sequence of *Foph***



262 In our previous study, eight homologous effectors were identified in *Foph* by *in planta* RNAseq  
263 mapping analysis with the LS regions of *Fol* (Simbaqueba et al., 2018). Here, we performed a  
264 combination Blastp and Blastx searches of the known SIX effectors and Ave1 effectors in the  
265 genome assemblies of the 24 *F. oxysporum* ff. spp. (including *Foph*), compared in this study (Table  
266 2). This result showed the widespread presence of SIX homologues in different ff. spp. of *F.*  
267 *oxysporum* and specifically, confirming the presence of highly identical (87 to 100 %) of *Fol*  
268 homologous effectors in the genome of *Foph*. Interestingly, in this search we also identified a highly  
269 identical putative homologous transcript of the *Fol* SIX13 effector present in *Foph*. This prediction  
270 was manually confirmed as the corresponding transcript of SIX13, was fragmented into two contigs  
271 (ctg\_1292 and ctg\_1535) in the *Foph* genome (Table 3).

272 These results also confirmed that the *Fol* effector gene cluster formed by the SIX7, 12 and 10 (Ma et  
273 al., 2010; Schmidt et al., 2013) and partially identified in *Foph* by *in planta* transcriptomics  
274 (Simbaqueba et al., 2018), is entirely conserved in the genome of *Foph*. SIX7 and SIX12  
275 homologues are both present in the same contig (ctg\_568) while SIX10 is located in another contig  
276 (ctg\_789) of the *Foph* genome assembly (Table 3). Thus, we manually inspected the sequences of  
277 these contigs and found that both contigs are overlapped by a sequence segment of 22 bp at the  
278 proximal 5' end of the ctg\_586 with the distal 3' end of the ctg\_789. This overlapped segment of both  
279 contigs correspond to a *mimp* class 2 sequence in intergenic region between SIX10 and SIX12. The  
280 *Foph* effector gene cluster is 4.7 kb in length and is similar to that formed by the same homologous  
281 effectors in *Fol* (5.2kb), including the intergenic regions with the approximate same length as *Fol*  
282 (i.e. 1.8 kb between SIX7 and SIX12 and 1.4 kb between SIX12 and SIX10, respectively), and three  
283 *mimp* elements that flank the effector gene cluster reported by Schmidt et al, (2013) in *Fol* (Figure  
284 2).

285 Further inspection of the ctg\_568, also confirmed the presence of another highly conserved  
286 homologous gene (FOXG\_17458) between *Foph* and *Fol*, including the corresponding *mimp* class 1  
287 element in the 5' UTR (Figure 2). The transcript FOXG\_17458 in *Fol*, encode one transcription factor  
288 of the family aTF1 - FTF1 (van der Does et al., 2016), and is located 9 kb away from the ORF of the  
289 SIX7, while its counterpart homologous sequence presented in *Foph* is located 7kb away from the  
290 SIX7 ORF. This finding suggests a highly probable horizontal transfer of a chromosomal segment of  
291 at least 20 kb in length between *Fol* and *Foph* (Figure 2). In *Fol*, SIX15 is a non-annotated transcript  
292 and is located 55 kb away from the aTF1. This chromosome region includes four annotated  
293 transcripts: FOXG\_17459, FOXG\_17460, FOXG\_17461 and FOXG\_17462. Thus, we performed a  
294 Blastn search using this sequence of 55kb from *Fol* as a query and compared with the *Foph*

295 genome assembly, in order to test whether an extended sequence of the chromosome 14 of *Fol* is  
296 conserved in *Foph*. However, no additional chromosomal segment shared between *Fol* and *Foph*  
297 was identified by comparing both genomic sequences.

### 298 **Novel candidates for effector genes in *Foph***

299 We identified novel effector genes in the *Foph* genome, by combining the sets of proteins from the  
300 secretome and effectorome respectively. We predicted a total of 1495 secreted proteins, forming the  
301 *Foph* secretome, from which 276 were determined to be effectors, named herein as “*Foph*  
302 effectorome”. Seven transcripts of the *Foph* effectorome were identified as novel effectors, due to  
303 the lack (*Foph\_eff2*, *Foph\_eff3*, *Foph\_eff4* and *Foph\_eff7*) or low similarity (*Foph\_eff5* and  
304 *Foph\_eff6*) to any protein reported in the public databases (Table 2). Additionally, *mimp* elements  
305 were identified 624bp and 430bp upstream from the transcripts *Foph\_eff2* and *Foph\_eff5*,  
306 respectively (Table 3)

307 The candidate effector *Foph\_eff1* showed significant tBLASTn hits with different *F. oxysporum* ff.  
308 spp., including the non-pathogenic Fo47. Therefore, this transcript could be excluded as a novel  
309 effector gene. The unique candidates *Foph\_eff3* and *Foph\_eff4* are clustered in the contig\_692 at  
310 700 bp of distance approximately between them. Furthermore, we predicted a transmembrane  
311 domain for protein encoded by *Foph\_eff3* (Table 3), suggesting a cellular localization and with a  
312 possible different function from a secreted protein. Additionally, we performed an RNAseq mapping  
313 against the ORF of the novel candidate effectors and found that six out of the seven candidates are  
314 expressed during cape gooseberry infection at 4 dpi. In this analysis we also included the  
315 homologues of SIX effectors and homologues in *Foph* of the EF1a, Beta tubulin chain (*β-tubulin*)  
316 and *Fusarium* extracellular matrix 1 (*FEM1*), as housekeeping genes for expression controls. We  
317 found that *Foph\_eff1*, *eff4*, *eff6* and *eff7*, showed higher expression compared to the rest of the  
318 transcripts analysed (Figure 3). Interestingly, *eff2*, *eff4*, and *eff6*, showed higher expression,  
319 compared to all three controls. These results support the evidence of these novel candidates as  
320 putative effectors in *Foph*, that could be involved in pathogenicity.

### 321 **Novel effectors are present in *F. oxysporum* isolates associated to the cape gooseberry crop**

322 In order to test if the candidate effectors genes could be used as potential molecular makers for  
323 *Foph* identification in diagnostic strategies, we performed a preliminary screening of the novel  
324 candidate effectors by PCR amplification in a panel of 36 *F. oxysporum* isolates (including *Foph*-  
325 MAP5), obtained from cape gooseberry crops. The isolates have been classified, based on their  
326 ability to cause wilting symptoms (32) and non-pathogenic (4), on a susceptible cape gooseberry

327 genotype (Supplementary Table S2). The screening also included DNA isolated from *Fol*, *FocR1*  
328 and *FocTR4* strains, as control for amplification. We found amplification for all candidates in the  
329 majority of *F. oxysporum* isolates associated to cape gooseberry, including pathogenic and non-  
330 pathogenic (Supplementary Table S2 and Figure S1). Therefore, we did not identify specificity of the  
331 candidate effectors for the putative *Foph* pathogenic isolates. However, we did not identify the  
332 presence of the novel effectors *Foph\_eff3*, *eff4*, *eff5*, *eff6* and *eff7* in the control strains *Fol*, *FocR1*  
333 and *FocTR4*. This result suggests that these five novel candidates could be specific for *F.*  
334 *oxysporum* strains associated to the cape gooseberry crop. We also conducted a molecular  
335 characterization using the *EF1a* sequence of 28 out of 36 *F. oxysporum*, in order to test whether  
336 these isolates associated to cape gooseberry host, might be originated from a single lineage.  
337 However, the phylogenetic tree showed that these 28 isolates are grouped together in two different  
338 lineages, compared to the ff. spp. of *F. oxysporum*, suggesting the polyphyletic origin of *Foph*  
339 related strains (Figure 4).

340

## 341 **DISCUSSION**

### 342 ***Foph* genome and phylogenetic relationship with other ff. spp.**

343 In Colombia, the cape gooseberry crop is severely affected by pathogenic strains of *Foph*, with  
344 losses of nearly 90%. In this pathosystem, SNPs associated to resistant cape gooseberry  
345 genotypes, *Foph* pathogenic strains and homologous effectors have been identified (Osorio-Guarin  
346 et al., 2016; Simbaqueba et al., 2018). However, there is a need to implement genomic approaches  
347 to corroborate these findings and to identify new sources associated to the interaction between *Foph*  
348 and cape gooseberry. These approaches could be used in the development of disease management  
349 strategies and plant breeding programs in the cape gooseberry crop. Here we sequenced and  
350 assembled the genome of the highly virulent strain *Foph*-MAP5, aiming to identify novel candidates  
351 for effector genes that could be characterized in further studies and implemented in diagnostic  
352 strategies. Comparative and functional genomics of *F. oxysporum* that infect cucurbit species,  
353 suggested that their host range could be determined by the close phylogenetic relationship  
354 associated to their homologue effector gene content (van Dam et al., 2016, 2017b). This hypothesis  
355 is supported by additional evidence on the formae speciales *radicis-cucumerinum* (*Forc*) and  
356 *melonis* (*Fom*), showing that a syntenic LS chromosome region is highly related to the expansion  
357 formae speciales range (van Dam et al., 2017b; Li et al., 2020b). Recent genome analysis on the  
358 chromosome-scale assembly of the brassicas infecting f. sp. Fo5176, showed a similar pattern of  
359 phylogenetic relationship possibly associated to the expansion of their host range (Fokkens et al.,

360 2020). We performed comparative genomics using the *Foph* genome assembly in order to test  
361 whether a set of available genomes of Solanaceous-infecting formae speciales including *Foph*,  
362 could show a similar phylogenetic related pattern. Nevertheless, our analysis showed that the tested  
363 strains have a different ancestry (Figure1), despite the close relationship of *Foph* with tomato  
364 infecting ff. spp. *Fol*-R3, Fo47, Forl and tobacco *Fonic\_003*, and our previous evidence on horizontal  
365 gene transfer of effectors between *Fol* and *Foph*. Resequencing of the genomes including *Foph*,  
366 *Fophy*, *Fonic* and *Fome1*, using long reads, will help to gain a deeper understanding of the  
367 phylogenetic relationship among Solanaceous-infecting ff. spp.

### 368 **Confirmation of homologues and identification of new ones**

369 Homologues of *Fol* SIX genes have been identified in other ff. spp. of *F. oxysporum* and other  
370 *Fusarium* species (Thatcher et al., 2012; Meldrum et al., 2012; Rocha et al., 2016; Schmidt et al.,  
371 2016; Li et al., 2016; Taylor et al., 2016, 2019; van Dam et al., 2016, 2017a; Williams et al., 2016;  
372 Simbaqueba et al., 2018; Armitage et al., 2018). The presence of the SIX homologues might be a  
373 consequence of horizontal transfer of genes or segments of pathogenicity chromosomes between  
374 different strains of *F. oxysporum* and/or fungal phytopathogenic species. In our previous study, we  
375 identified homologues of the SIX, Ave1 and FOXM\_16306 effectors, analysing an in *planta* RNAseq  
376 of *Foph*. Despite the fragmentation of this genome assembly (i.e. no scaffolds generated), we  
377 corroborated the presence of complete sequences of the homologous effectors SIX, Ave1 and  
378 FOXM\_16306, contained in different contigs that could correspond to the LS regions of the *Foph*  
379 genome (Tables 2 and 3).

380 We also found a homologue transcript of the *Fol* SIX13 in the genome of *Foph*, fragmented into two  
381 contigs. This homologue was not expressed at 4 dpi and therefore, it was not identified in our  
382 previous transcriptomics study. SIX13 homologues are present in legume, cucurbits, musaceous  
383 and solanaceous infecting ff. spp. of *F. oxysporum* (Ciszlowski et al., 2016; van Dam et al., 2016;  
384 Williams et al., 2016). The later mentioned ff. spp., are highly identical at the protein level (96% in  
385 *Fome1* and 99% in *Foph* and *Fophy*, respectively) (Table 2). In cucurbits infecting ff. spp. of *F.*  
386 *oxysporum*, a suit of effectors was found to be associated with host specificity (van Dam et al.,  
387 2016). Thus, the highly identical SIX13 homologues in the Solanaceous-infecting ff. spp., could be  
388 related to their specificity for these group of host species. Moreover, the majority of the SIX genes in  
389 *Fol* are located on the chromosome 14 (i.e. pathogenicity chromosome), except for SIX13, which is  
390 found in the LS chromosome 6 (Schmidt et al., 2013). Similarly, SIX13 corresponding homologues  
391 of *Fomed* and *Foph* are located on LS regions (Williams et al., 2016; Table 2). In *Foc*, SIX13  
392 homologues, have been associated to the differentiation of TR4 and R4 and are currently used in

393 molecular based diagnostic of TR4 in banana crops (Cahrvalis et al., 2019). Together, this evidence  
394 suggests that SIX13 could play a role in pathogenicity or host specificity. Future functional analysis  
395 of on *Foph*-SIX13 is necessary to confirm this hypothesis.

396 Furthermore, we performed a manual inspection of the contigs 568 and 789 of the *Foph* genome  
397 and confirmed the presence of a highly conserved chromosomal segment of 20kb of *Fol* that  
398 includes a cluster of physically linked effector genes (SIX7, SIX10, SIX12 and extended transcription  
399 factor  $\alpha$ TF1). This shared region also included their corresponding flanking *mimp* elements (Figure  
400 2, Schmidt et al., 2013; Simbaqueba et al., 2018). This finding suggests a highly probable horizontal  
401 acquisition of an entire genomic segment of 20kb from an ancestor of *Fol* or *Foph*. Miniature impala  
402 (*mimp*) transposable elements (TEs), have been identified in the genome sequences of different  
403 phytopathogenic fungi of the *Fusarium* genus (Schmidt et al., 2013; van Dam and Rep, 2017). In *F.*  
404 *oxysporum*, *mimp* elements have been associated to the gain or loss of effector genes, presumably  
405 acting as an evolutionary mechanism of emergence of new phytopathogenic strains (van Dam et al.,  
406 2017b). The presence highly identical *mimp* elements, flanking the homologous effector gene cluster  
407 in both *Fol* and *Foph* (Figure 2), suggests that these TEs could play a role in the lateral transference  
408 of this homologue genomic region between *Foph* and *Fol*.

409 Functional analysis of SIX effectors in *Fol*, showed that mutant strains with a large deletion (0.9 Mb)  
410 of chromosome 14, including the candidate effector genes SIX6, SIX9 and SIX11 did not show any  
411 loss of virulence compared to wild type *Fol* on tomato plants (Vlaardingerbroek et al., 2016). Recent  
412 evidence revealed by another set of *Fol* mutant strains with chromosomal deletions that include the  
413 SIX10, SIX12 and SIX7 gene cluster, showed no loss of virulence on tomato plants (Li et al., 2020a).  
414 These findings indicate that the genes located in these chromosomal segments (including the SIX  
415 genes with homologues in *Foph*), could be dispensable for pathogenicity, while the remaining  
416 segments could be sufficient for tomato infection (Vlaardingerbroek et al., 2016; Ling et al., 2020a).  
417 Although neither of the SIX7, SIX10 and SIX12 effector genes have a role in *Fol* virulence, the  
418 presence of the highly identical homologues between *Fol* and *Foph*, suggests that this segment  
419 could be undergoing adaptation to another environment (i.e. a different host plant). Therefore, it  
420 might be possible that SIX7, SIX10 and SIX12 have a role in *Foph* pathogenicity. Future  
421 investigation about the function of this conserved genomic region between these two Solanaceous-  
422 infecting ff. spp., is required. Crossed pathogenicity assays inoculating tomato and cape gooseberry  
423 with *Fol* and *Foph* and knock out of the gene cluster in *Foph* could be performed to support these  
424 hypotheses.



425 In this study, we confirmed that homologues of *Ave1* have been only identified in the solanaceous  
426 infecting ff. spp. *Fol*, *Foph*, *FomeI001* (Table 2) and in the f. sp. *gladioli* of *F. oxysporum*  
427 (Simbaqueba et al., 2018). *Ave1* could also be present in putative conditional dispensable segments  
428 on the *Foph* genome (Table 2, Figure 1). The presence of less conserved homologues of *Fol*  
429 including *SIX1* and *Ave1*, which are also located on *Fol* chromosome 14 (Schmidt et al., 2013),  
430 suggests that these effectors may have a different ancestry, via acquisition of different segments of  
431 the pathogenicity chromosome at different times in the evolution of *Fol* or *Foph*.

432 In the tomato pathogen *Verticillium dahliae*, *Ave1* is involved in pathogenicity, while there is no  
433 evidence that its homologue present in *Fol* has a role in virulence (de Jonge et al., 2012; Schmidt et  
434 al., 2013). Furthermore, *Fol-Ave1* is not expressed during tomato infection (Catanzariti, personal  
435 communication). Conversely, we found that *Foph-Ave1* was expressed during cape gooseberry  
436 infection (Figure 3). This finding suggests that *Ave1* might have a role in *Foph* pathogenicity.  
437 Therefore, functional analyses are required by generating gene knockout strains in *Foph*. In both *V.*  
438 *dahliae* and *Fol*, *Ave1* could act as avirulence factors since they are recognised by the tomato  
439 receptor *Ve1* (de Jonge et al., 2012). The *Ave1* homologue of *Foph* is highly similar at the protein  
440 level to its counterparts in *F. oxysporum* (*Fol*, *FomeI* and *Fogla*), and less similar to *V. dahliae* *Ave1*  
441 (Table 2, Simbaqueba et al., 2018). The presence of *Ave1* in *Foph*, suggests that the avirulence  
442 function of *Fol* *Ave1* might be conserved. This hypothesis needs further investigation e.g. by testing  
443 for recognition of *Foph* *Ave1* by tomato *Ve1* or a homologue in cape gooseberry.

444 Novel candidate effectors in *F. oxysporum* have been reported for other ff. spp., including *Fom*,  
445 *Foc\_Fus2*, *Fonar* and legume infecting strains (Schmidt et al., 2015; Taylor et al., 2016, 2019;  
446 Williams et al., 2016; Armitage et al., 2018; van Dam et al., 2018), based on the analysis of their  
447 genome sequences to identify transcripts that encode for small proteins with a secretion signal  
448 peptide and the proximity of mimp to the start codon. Here, we used the predicted transcripts from  
449 the genome assembly of *Foph* to identify novel effectors, based on the effectorome, secretome  
450 repertoires and the absence or low similarity to any predicted or non-predicted protein sequences  
451 compared to genomes available in the public databases (Tables 2 and 3). Three highly expressed  
452 novel effectors during infection (*Foph\_eff2*, *eff4* and *eff7*), are unique *Foph* candidate effectors,  
453 while the other highly expressed candidate *Foph\_eff6*, have identical homologous proteins in the  
454 genomes of *FomeI* and *FoC\_Fus2* (Table 2). Furthermore, the homologous counterpart identified in  
455 *FoC\_Fus2* is located in a lineage specific region (Armitage et al., 2018). These findings suggest that  
456 *Foph\_eff6* and its homologues, may have a putative role in pathogenicity and represent a subject for  
457 future functional analysis.



## 458 **Presence of effectors in the *Foph* strains and compared to other ff. spp.**

459 *Foph* pathogenic strains are responsible for the wilting disease that affect cape gooseberry crops in  
460 Colombia. Thus, appropriate disease management strategies are needed to be implemented  
461 (Barrero et al., 2012). However, the development of those strategies has been largely limited due to  
462 the lack of knowledge of the wilting disease caused by *Foph*, and accurate identification of  
463 pathogenic strains. Detection methods based on the use of effector genes as molecular markers are  
464 highly desirable for precise identification of pathogenic strains in disease management programs of  
465 soilborne pathogens due to their limited sequence diversity between members of the same *f. sp.*  
466 (Rocha et al., 2016; Gordon TR, 2017), thus providing a solid and sensitive identification of  
467 pathogenic strains of soilborne pathogens including *F. oxysporum* (van Dam et al., 2017a; Cahrvallis  
468 et al., 2019; Taylor et al., 2019).

469 Comparative genomics have been performed to design molecular markers based on candidate  
470 effector genes and successfully tested for the identification of cucurbit and *Narcissus* Infecting ff.  
471 spp of *F. oxysporum*. (van Dam et al., 2016; Taylor et al., 2019). In this study, we used the highly  
472 conserved novel candidate effectors found by comparative genomics in *Foph*, to explore their  
473 usefulness as potential molecular markers specific for pathogenic strains. The presence of  
474 homologous effectors suggests a functional redundancy between different ff. spp. (Taylor et al.,  
475 2019). Here, we identified that the candidate novel effector *Foph\_eff1* has homologues in other ff.  
476 spp. (Table 2). We also identified the presence of *eff1* in all tested strains, including *Fol* and *Foc*.  
477 Thus, the role of *eff1* in pathogenicity may be dispensable due to its presence in different *F.*  
478 *oxysporum* strains and could be discarded for diagnostic purposes. The remaining novel effectors  
479 showed a clear pattern of amplification in *F. oxysporum* strains associated to the cape gooseberry  
480 crop, compared to the highly pathogenic *Fol* and *Foc* in tomato and banana respectively  
481 (Supplementary Figure S1 and Table S2). However, we did not find an amplification pattern  
482 associated to the pathogenic strains for any of the effectors tested. A similar inconsistent pattern of  
483 presence/absence between pathogenic and non-pathogenic cucurbit infecting strains of *F.*  
484 *oxysporum* was observed for some of the effectors-based markers developed by van Dam et al,  
485 (2017a). These results might be supported by the fact that effectors show limited sequence diversity  
486 between strains of the same *f. sp.* (van Dam et al., 2017; Taylor et al., 2019). An alternative  
487 explanation could be related with the limited number of effectors-based markers identified in this  
488 fragmented genome assembly of *Foph*. New markers associated to *Foph* pathogenicity will be  
489 predicted in future studies, enlarging effectorome repertoire from the resequencing of the *Foph*

490 genome using long reads sequencing technologies as performed for *Forc* and *FoC\_Fus2* (van Dam  
491 et al., 2017b; Armitage et al., 2018).

492

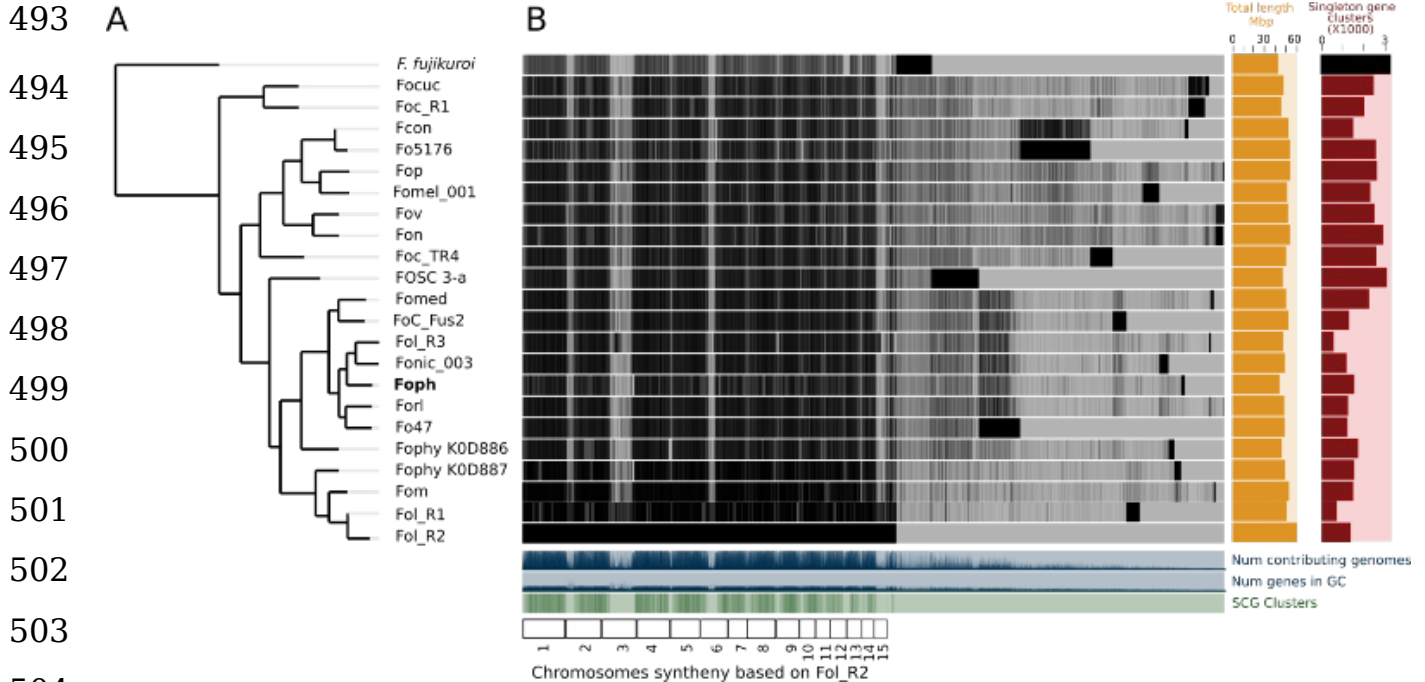

505 **Figure 1.**

506 Comparative genomics between *Foph* and 21 *F. oxysporum* ff. spp. **A.** The phylogenomic tree was inferred  
507 with the single copy orthologous genes of the 22 genomes of *F. oxysporum* used in this analysis. The amino  
508 acid sequence of the translated genes was concatenated, and the final alignment consists of a total of  
509 4184361 amino acid positions. The phylogenetic tree was constructed using FastTree 2.1. *F. fujikuroi*  
510 (IMI58289), was used as outgroup. **B.** Pan-genomic analysis of *F. oxysporum*, showing the core genome the  
511 species complex and single copy orthologous genes, possibly forming the LS genome for each forma  
512 specialis. The *F. oxysporum* pan-genome was generated using the anvio pangenomic workflow.

513

514

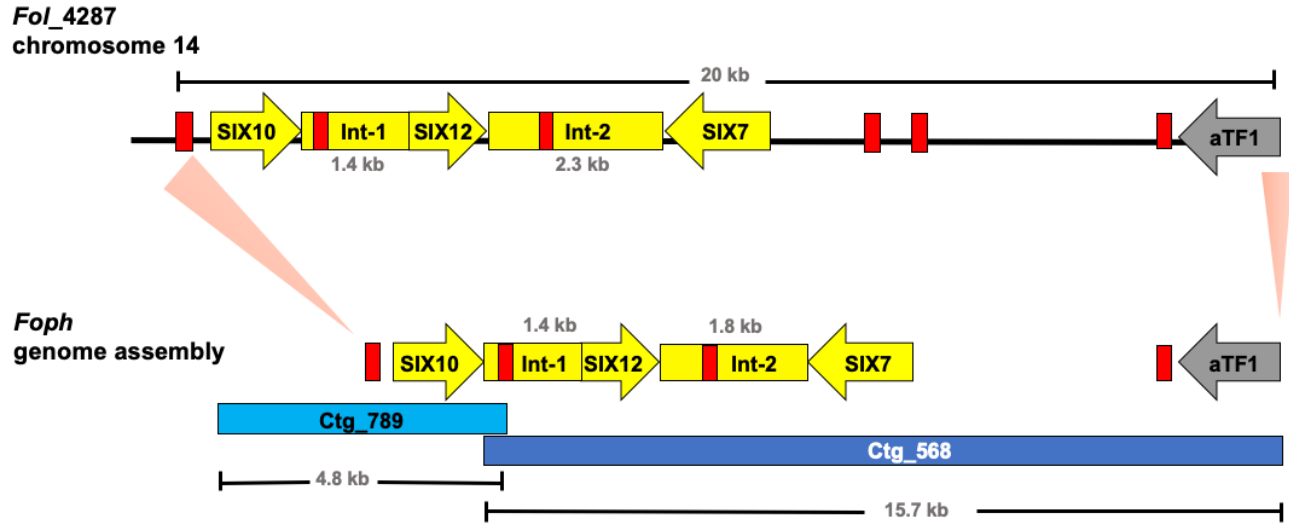

515 **Figure 2.**

516 Graphical representation of a 20 kb segment of the chromosome 14 in *Fol*, containing the cluster of effectors  
517 SIX10, 12 and 7, and the aTF1 gene (FOXN\_17458) (upper part). The chromosomal segment is conserved in  
518 the *Foph* genomic region (shown by orange pale triangles), corresponding to the overlapped Contigs 568 and  
519 789 (Bottom part), suggesting a highly possible horizontal transfer of a chromosomal segment of 20kb  
520 between both ff. spp. Int-1= conserved intergenic region between SIX10 and SIX12. Int-2= conserved  
521 intergenic region between SIX12 and SIX7. Red blocks represent *Mimp* transposable elements flanking the  
522 cluster of effector genes shared between *Fol* and *Foph*.

523

524 **Figure 3.**

525 Expression analysis of the effectors identified in the genome sequence of *Foph*\_MAP5, using the RNAseq  
526 data from cape gooseberry susceptible plants inoculated with *Foph* at 4 dpi, reported in our previous *in planta*  
527 transcriptomic analysis. Pale blue panel indicate the genes translation elongation factor alpha (EF1a), tubulin  
528 B-chain (B-tubulin) and *Fusarium* Extracellular Matrix 1 (FEM1), to use as constitutive expressed control  
529 genes of *Foph* during host infection. Pale green indicates the expression of the homologous effectors  
530 identified in *Foph*. Pale yellow indicates the expression of the newly identified effectors in *Foph*. Six out of  
531 seven new effector candidates are expressed during cape gooseberry infection with a higher expression of  
532 *eff2*, *eff4* and *eff6*, compared to the rest of the effectors analysed. RPKM= reads per kilobase per million of  
533 mapped reads. Scale bars indicate standard error

534 **Figure 4.**

535 Phylogenetic tree of a partial sequence of the EF1a gene from the genome sequences of 24 ff. spp. of *F.*  
536 *oxysporum* (Table S1) and from 26 *F. oxysporum* isolates obtained from cape gooseberry crops (Table S2).  
537 The phylogenetic analysis was conducted using BEAST. Node shapes indicate the bootstrapping support,  
538 indicated as Bayesian posterior probabilities. The scale bar indicates time in millions of years.

539

540 **TABLES**

541 **Table 1.** *Foph* genome assembly statistics, compared to other Illumina genome sequences of ff. spp. of *F.*  
542 *oxysporum* Solanaceous infecting strains and two nearly complete genome assemblies of *Fol* and *FoC*.

| Strain                 | Seq. Platform | No. of Contigs | Maximum length (kb) | N50 (kb) | GC (%) | Assembly length (Mb) | Transcripts |
|------------------------|---------------|----------------|---------------------|----------|--------|----------------------|-------------|
| <b><i>Foph</i></b>     | Illumina      | 1856           | 453                 | 70       | 48.5   | 44.9                 | 14897       |
| <b>MAP5</b>            |               |                |                     |          |        |                      |             |
| <b><i>Fophy</i></b>    | Illumina      | 488            | 2037                | 1167     | 47.7   | 47.2                 | 23095       |
| <b>KOD886</b>          |               |                |                     |          |        |                      |             |
| <b><i>Fophy</i></b>    | Illumina      | 1275           | 1667                | 547      | 47.6   | 50.4                 | 24279       |
| <b>KOD887</b>          |               |                |                     |          |        |                      |             |
| <b>Fomel</b>           | Illumina      | 1725           | 2348                | 227      | 47.5   | 52.3                 | 16492       |
| <b>001</b>             |               |                |                     |          |        |                      |             |
| <b>Fonic</b>           | Illumina      | 638            | 2572                | 1159     | 47.6   | 49.9                 | 15480       |
| <b>003</b>             |               |                |                     |          |        |                      |             |
| <b><i>Fol_4287</i></b> | PacBio        | 88             | 6854                | 458      | 48.3   | 61.4                 | 27347       |
| <b><i>FoC_Fus</i></b>  | PacBio        | 34             | 6434                | 414      | 47.7   | 53.4                 | 19342       |

543

544

545

546

547

548

549

550

551

552

553

554

555

556

557

558

**Table 2.** tBlastn identities of *Foph* effectors compared against the *F. oxysporum* species complex WGS databases

| <i>F. oxysporum</i><br>ff. spp. | <i>Foph</i> effectors |       |         |      |      |          |      |         |      |      |       |       |         |       |       |       |          |            |      |      |      |      |         |      |         |
|---------------------------------|-----------------------|-------|---------|------|------|----------|------|---------|------|------|-------|-------|---------|-------|-------|-------|----------|------------|------|------|------|------|---------|------|---------|
|                                 | SIX1a                 | SIX1b | SIX2    | SIX3 | SIX4 | SIX5-Fol | SIX6 | SIX7    | SIX8 | SIX9 | SIX10 | SIX11 | SIX12   | SIX13 | SIX14 | SIX15 | Ave1-Fol | FOXM_16306 | Eff1 | Eff2 | Eff3 | Eff4 | Eff5    | Eff6 | Eff7    |
| <i>Foph</i>                     | 100                   | 100   |         |      |      | 50       |      | 10<br>0 |      |      | 100   |       | 10<br>0 | 100   |       | 100   | 87       | 97         | 100  | 100  | 100  | 100  | 10<br>0 | 100  | 10<br>0 |
| <i>Fophy</i> KOD886             |                       |       |         |      |      | 50       |      |         |      |      |       |       |         |       |       |       |          |            | 89   | 97   |      |      |         |      | 100     |
| <i>Fophy</i> KOD887             | 99                    | 73    |         |      |      | 53       |      |         |      | 80   |       | 100   |         | 99    |       | 99    |          | 97         | 91   |      |      |      |         |      |         |
| <i>Fol</i> MN25 (race3)         | 71                    | 80    | 10<br>0 | 99   |      | 100      | 100  | 99      | 71   | 100  | 100   | 99    | 10<br>0 | 99    | 100   | 99    | 100      |            |      |      |      |      |         |      |         |
| <i>Fol</i> 4287 (race 2)        | 71                    | 80    | 10<br>0 | 100  |      | 100      | 100  | 99      | 100  | 100  | 100   | 99    | 10<br>0 | 99    | 100   | 99    | 100      |            |      |      |      |      |         |      |         |
| <i>Fol</i> 004 (race 1)         | 71                    | 80    | 10<br>0 | 100  | 100  | 100      | 100  | 99      | 100  | 100  | 100   | 99    | 10<br>0 | 99    | 100   | 99    | 100      |            |      |      |      |      |         |      |         |
| <i>Fol</i>                      |                       |       |         |      |      | 50       |      |         |      |      |       |       |         |       |       |       |          |            |      |      |      |      |         |      |         |
| Fo47                            |                       |       |         |      |      | 53       |      |         |      |      |       |       |         |       |       |       |          |            |      | 99   |      |      |         |      |         |
| <i>Fomel</i>                    | 72                    | 74    |         |      |      | 53       |      |         | 87   | 53   |       |       |         | 96    |       |       | 82       |            | 97   |      |      |      |         |      |         |
| <i>Fonic</i>                    | 53                    | 53    |         |      |      | 50       |      |         |      |      |       |       |         |       |       |       |          |            |      |      |      |      |         |      |         |
| <i>Fom</i> _26406               | 71                    | 76    |         |      |      | 53       | 91   |         |      |      |       | 96    |         | 93    |       |       |          |            | 89   |      |      |      |         |      |         |
| <i>Fov</i>                      | 62                    | 62    |         |      |      | 59       |      |         |      | 99   |       |       |         | 95    |       |       |          |            |      |      |      |      |         |      |         |
| <i>FoC_Fus2</i>                 |                       |       |         | 86   |      | 78       |      | 79      |      | 51   | 93    |       | 94      |       | 70    |       |          |            |      |      |      | 96   |         |      |         |
| <i>Foc_R1</i>                   | 67                    | 73    |         |      | 89   | 53       | 67   |         |      | 51   |       |       |         | 88    |       |       |          | 90         | 97   |      |      |      |         |      |         |
| <i>Foc_TR4</i>                  | 71                    | 71    | 65      |      | 91   | 50       | 68   |         | 84   | 51   |       |       |         | 88    |       |       |          | 89         | 91   |      |      |      |         |      |         |
| <i>Fon</i>                      |                       |       |         | 80   | 53   | 91       |      |         | 86   | 88   |       | 96    |         | 94    | 56    |       |          |            |      | 98   |      |      |         |      |         |
| <i>Focuc</i>                    |                       |       |         |      |      | 88       |      |         | 72   | 52   |       | 96    |         |       |       |       |          |            |      |      |      |      |         |      |         |
| <i>Fomed</i>                    | 58                    | 62    |         |      |      | 50       |      |         | 94   | 47   |       |       |         | 95    |       |       |          | 10<br>0    | 92   |      |      |      |         |      |         |
| Fo5176                          | 66                    | 73    |         |      | 100  | 53       |      |         | 87   | 49   |       |       |         |       |       | 50    |          |            | 98   |      |      |      |         |      |         |
| <i>Fcon</i>                     | 66                    | 73    |         |      | 100  | 53       |      |         | 87   | 62   |       |       |         |       |       | 50    |          |            | 100  |      |      |      |         |      |         |
| <i>Fop</i>                      | 70                    | 64    |         |      |      | 53       |      |         |      | 53   |       |       |         | 92    | 83    |       |          |            | 98   | 100  |      |      |         |      |         |



---

FOSC\_3-a

46

100

97

---

561 **Table 3.** Genomic analysis of the effectors identified in the *Foph* genome

562

| Genomic features     |                   | <i>Foph</i> effectors |       |      |       |       |           |       |      |            | Novel candidates |      |      |      |      |      |      |
|----------------------|-------------------|-----------------------|-------|------|-------|-------|-----------|-------|------|------------|------------------|------|------|------|------|------|------|
|                      |                   | Homologues            |       |      |       |       |           |       |      |            | eff 1            | eff2 | eff3 | eff4 | eff5 | eff6 | eff7 |
|                      |                   | SIX1a                 | SIX1b | SIX7 | SIX12 | SIX10 | SIX13     | SIX15 | Ave1 | FOXM_16306 |                  |      |      |      |      |      |      |
| Gene                 | Contig            | 593                   | 569   |      | 568   | 789   | 1292-1535 | 709   | 1018 | 1149       | 583              | 692  | 1304 | 1453 | 1487 | 359  |      |
|                      | Contig size (kb)  | 7.9                   | 5.4   |      | 15.86 | 4.8   | 1.6-1     | 0.8   | 2.7  | 1.2        | 4.3              | 4.8  | 2.1  | 1.3  | 0.3  | 22.5 |      |
|                      | Length (bp)       | 874                   | 855   | 491  | 432   | 520   | 941       | 403   | 378  | 366        | 493              | 491  | 519  | 604  | 343  | 384  | 252  |
|                      | CDS (bp)          | 874                   | 855   | 491  | 384   | 450   | 774       | 300   | 378  | 366        | 267              | 270  | 519  | 456  | 291  | 384  | 252  |
|                      | <i>mimp</i> class | 4                     | NM    | 1    |       | 1, 2  | NM        | NM    | 2    | 1          | 4                | NM   | NM   | 1    | NM   | NM   | NM   |
| Protein              | Length (aa)       | 285                   | 284   | 163  | 128   | 150   | 258       | 100   | 125  | 122        | 89               | 90   | 173  | 151  | 93   | 127  | 84   |
|                      | SignalP           | Y                     | Y     | Y    | Y     | Y     | Y         | Y     | Y    | Y          | Y                | Y    | Y    | Y    | Y    | Y    | Y    |
|                      | TMHMM             | 0                     | 0     | 0    | 0     | 0     | 0         | 0     | 0    | 0          | 0                | 1    | 0    | 0    | 0    | 0    | 0    |
|                      | EffectorP         | Y                     | Y     | Y    | Y     | Y     | N         | Y     | Y    | Y          | Y                | Y    | Y    | Y    | Y    | Y    | Y    |
|                      | ApoplastP         | N                     | N     | Y    | Y     | Y     | N         | N     | Y    | Y          | Y                | Y    | Y    | Y    | Y    | N    | Y    |
| RNAseq reads aligned |                   | 4.1                   | 10.1  | 3    | 4.7   | 3.4   | 0         | 3.4   | 2.5  | 2.1        | 20               | 7    | 22   | 2    | 14   | 5    | 0    |

563 NM= no *mimp* element identified

564

565

566

567

568

## 569 **Data availability statement**

570

571 The genome assembly of *Foph* is available on NCBI under the BioProject accession number  
572 PRJNA640423. GenBank accession numbers: MT738929 – *Foph* SIX13, MT38930-MT38936-*Foph*  
573 *eff1* to *eff7*, MT738937 - MT738958 *EF1a* sequences of *F. oxysporum* strains associated to cape  
574 gooseberry crops. Access to these sequences must be requested to the Ministry of Environment  
575 and Development of Colombia.

576 *Foph* strains used in this work were collected under the framework collection permit No.1466 from  
577 2014 of AGROSAVIA and registered in the National Collections Registry (RNC129) of Colombia

## 578 **Conflict of Interest**

579

580 *The authors declare that the research was conducted in the absence of any commercial or financial*  
581 *relationships that could be construed as a potential conflict of interest.*

582

## 583 **Author Contributions**

584

585 JS planned and carried out the *Foph* genome analysis, planned the experiments, analysed the data,  
586 created figures, and drafted, wrote and edited the manuscript. ER and DB carried out the  
587 experiments with *Foph* isolates. CG obtained funding, planned experiments, contributed and edited  
588 the manuscript. AC obtained funding, planned and carried out the *Foph* genome sequencing,  
589 analysis and all bioinformatics, created figures, drafted and edited the manuscript.

590

## 591 **Funding**

592 This work was funded by the resources from the internal research agenda (TV15, project ID: 601)  
593 and from AGROSAVIA-Los Andes University Agreement (TV18-01, project ID:1000930)

594

## 595 **Acknowledgments**

596

597 J.S. was supported by a Postdoctoral Fellowship from the Ministry of Science, Technology and  
598 Innovation (MINCIENCIAS), Colombia. We thank to Johan David Barbosa for his contribution to the  
599 results obtained in the molecular and pathogenic characterization of *Foph* strains, reflected in the  
600 Supplementary Table 2. We thank to Dr Mauricio Soto (AGROSAVIA) for provided DNA from

601 Colombian strains of *Fol*, *Foc R1* and *TR4*, used as PCR amplification controls. We thank grateful to  
602 Ministry of Agriculture and Rural Development of Colombia for the financial support.  
603  
604

## 605 Reference List

- 606 Almagro Armenteros, J. J., Tsirigos, K. D., Sønderby, C. K., Petersen, T. N., Winther, O., Brunak,  
607 S., et al. (2019). SignalP 5.0 improves signal peptide predictions using deep neural networks.  
608 *Nat. Biotechnol.* 37, 420–423. doi:10.1038/s41587-019-0036-z.
- 609 Andrews, S. (2015). FastQC: a quality control tool for high throughput sequence data. Available at:  
610 <http://www.bioinformatics.babraham.ac.uk/projects/fastqc/>.
- 611 Armitage, A. D., Taylor, A., Sobczyk, M. K., Baxter, L., Greenfield, B. P. J., Bates, H. J., et al.  
612 (2018). Characterisation of pathogen-specific regions and novel effector candidates in  
613 *Fusarium oxysporum* f. sp. *cepae*. *Sci. Rep.* 8. doi:10.1038/s41598-018-30335-7.
- 614 Barrero, L. S., Bernal, A., Navas, A., Rodríguez, A., López, C., González, C., et al. (2012).  
615 “Generación de valor para el desarrollo competitivo del cultivo de la uchuva como modelo de  
616 bioprospección de frutas en Colombia,” in *Bioprospección para el desarrollo del sector*  
617 *agropecuario de Colombia*, eds. A. M. Cotes, L. S. Barrero, F. Rodríguez, M. V. Zuluaga, and  
618 H. Arevalo (Bogota: Corporación Colombiana de Investigación Agropecuaria – CORPOICA),  
619 120–162. Available at: <https://www.agrosavia.co/>.
- 620 Bolger, A. M., Lohse, M., and Usadel, B. (2014). Trimmomatic: a flexible trimmer for Illumina  
621 sequence data. *Bioinformatics* 30, 2114–2120. doi:10.1093/bioinformatics/btu170.
- 622 Czislawski, E., Fraser-Smith, S., Zander, M., O’Neill, W. T., Meldrum, R. A., Tran-Nguyen, L. T. T.,  
623 et al. (2018). Investigation of the diversity of effector genes in the banana pathogen, *Fusarium*  
624 *oxysporum* f. sp. *cubense*, reveals evidence of horizontal gene transfer. *Mol. Plant Pathol.* 19,  
625 1155–1171. doi:10.1111/mpp.12594.
- 626 de Guillen, K., Ortiz-Vallejo, D., Gracy, J., Fournier, E., Kroj, T., and Padilla, A. (2015). Structure  
627 Analysis Uncovers a Highly Diverse but Structurally Conserved Effector Family in  
628 Phytopathogenic Fungi. *PLOS Pathog.* 11, 1–27. doi:10.1371/journal.ppat.1005228.
- 629 de Jonge, R., van Esse, H. P., Maruthachalam, K., Bolton, M. D., Santhanam, P., Saber, M. K., et al.  
630 (2012). Tomato immune receptor Ve1 recognizes effector of multiple fungal pathogens  
631 uncovered by genome and RNA sequencing. *Proc. Natl. Acad. Sci. U. S. A.* 109, 5110–5115.  
632 doi:10.1073/pnas.1119623109.

- 633 Di Pietro, A., Madrid, M. P., Caracuel, Z., Delgado-Jarana, J., and Roncero, M. I. G. (2003).  
634 *Fusarium oxysporum*: Exploring the molecular arsenal of a vascular wilt fungus. *Mol. Plant*  
635 *Pathol.* 4, 315–325. doi:10.1046/j.1364-3703.2003.00180.x.
- 636 Finn, R. D., Clements, J., and Eddy, S. R. (2011). HMMER web server: interactive sequence  
637 similarity searching. *Nucleic Acids Res.* 39, W29–W37. doi:10.1093/nar/gkr367.
- 638 Gurevich, A., Saveliev, V., Vyahhi, N., and Tesler, G. (2013). QUASt: quality assessment tool for  
639 genome assemblies. *Bioinformatics* 29, 1072–1075. doi:10.1093/bioinformatics/btt086.
- 640 Huerta-Cepas, J., Forslund, K., Coelho, L. P., Szklarczyk, D., Jensen, L. J., von Mering, C., et al.  
641 (2017). Fast Genome-Wide Functional Annotation through Orthology Assignment by eggNOG-  
642 Mapper. *Mol. Biol. Evol.* 34, 2115–2122. doi:10.1093/molbev/msx148.
- 643 Kumar, S., Stecher, G., and Tamura, K. (2016). MEGA7: Molecular Evolutionary Genetics Analysis  
644 Version 7.0 for Bigger Datasets. *Mol. Biol. Evol.* 33, 1870–1874. doi:10.1093/molbev/msw054.
- 645 Li, E., Wang, G., Xiao, J., Ling, J., Yang, Y., and Xie, B. (2016). A SIX1 homolog in *Fusarium*  
646 *oxysporum* f. sp. *conglutinans* is required for full virulence on cabbage. *PLoS One* 11, 1–15.  
647 doi:10.1371/journal.pone.0152273.
- 648 Li, J., Fokkens, L., van Dam, P., and Rep, M. (2020). Related mobile pathogenicity chromosomes in  
649 *Fusarium oxysporum* determine host range on cucurbits. *Mol. Plant Pathol.* 21, 761–776.  
650 doi:10.1111/mpp.12927.
- 651 Lievens, B., Rep, M., and Thomma, B. P. H. J. (2008). Recent developments in the molecular  
652 discrimination of formae speciales of *Fusarium oxysporum*. *Pest Manag. Sci.* 64, 781–788.  
653 doi:10.1002/ps.1564.
- 654 Lo Presti, L., Lanver, D., Schweizer, G., Tanaka, S., Liang, L., Tollot, M., et al. (2015). Fungal  
655 Effectors and Plant Susceptibility. *Annu. Rev. Plant Biol.* 66, 513–545. doi:10.1146/annurev-  
656 arplant-043014-114623.
- 657 Ma, L. J. (2014). Horizontal chromosome transfer and rational strategies to manage *Fusarium*  
658 vascular wilt diseases. *Mol. Plant Pathol.* 15, 763–766. doi:10.1111/mpp.12171.



- 659 Ma, L. J., Van Der Does, H. C., Borkovich, K. A., Coleman, J. J., Daboussi, M. J., Di Pietro, A., et al.  
660 (2010). Comparative genomics reveals mobile pathogenicity chromosomes in *Fusarium*. *Nature*  
661 464, 367–373. doi:10.1038/nature08850.
- 662 Meldrum, R. A., Fraser-Smith, S., Tran-Nguyen, L. T. T., Daly, A. M., and Aitken, E. A. B. (2012).  
663 Presence of putative pathogenicity genes in isolates of *Fusarium oxysporum* f. sp. *cubense*  
664 from Australia. *Australas. Plant Pathol.* 41, 551–557. doi:10.1007/s13313-012-0122-x.
- 665 Moreno-Velandia, C. A., Izquierdo-García, L. F., Ongena, M., Kloepper, J. W., and Cotes, A. M.  
666 (2019). Soil sterilization, pathogen and antagonist concentration affect biological control of  
667 *Fusarium* wilt of cape gooseberry by *Bacillus velezensis* Bs006. *Plant Soil* 435, 39–55.  
668 doi:10.1007/s11104-018-3866-4.
- 669 Osorio-Guarín, J. A., Enciso-Rodríguez, F. E., González, C., Fernández-Pozo, N., Mueller, L. A.,  
670 and Barrero, L. S. (2016). Association analysis for disease resistance to *Fusarium oxysporum*  
671 in cape gooseberry (*Physalis peruviana* L.). *BMC Genomics* 17, 248. doi:10.1186/s12864-016-  
672 2568-7.
- 673 Price, M. N., Dehal, P. S., and Arkin, A. P. (2010). FastTree 2 – Approximately Maximum-Likelihood  
674 Trees for Large Alignments. *PLoS One* 5, e9490. Available at:  
675 <https://doi.org/10.1371/journal.pone.0009490>.
- 676 Ramadan, M. F. (2011). Bioactive phytochemicals, nutritional value, and functional properties of  
677 cape gooseberry (*Physalis peruviana*): An overview. *Food Res. Int.* 44, 1830–1836. doi:https://  
678 doi.org/10.1016/j.foodres.2010.12.042.
- 679 Ramadan, M. M., El-Ghorab, A. H., Ghanem, K. Z., and others (2015). Volatile compounds,  
680 antioxidants, and anticancer activities of Cape gooseberry fruit (*Physalis peruviana* L.): an in-  
681 vitro study. *J. Arab Soc. Med. Res.* 10, 56.
- 682 Rocha, L. O., Laurence, M. H., Ludowici, V. A., Puno, V. I., Lim, C. C., Tesoriero, L. A., et al. (2016).  
683 Putative effector genes detected in *Fusarium oxysporum* from natural ecosystems of Australia.  
684 *Plant Pathol.* 65, 914–929. doi:10.1111/ppa.12472.
- 685 Schmidt, S. M., Lukasiewicz, J., Farrer, R., van Dam, P., Bertoldo, C., and Rep, M. (2016).  
686 Comparative genomics of *Fusarium oxysporum* f. sp. *melonis* reveals the secreted protein

- 687 recognized by the Fom-2 resistance gene in melon. *New Phytol.* 209, 307–318.  
688 doi:10.1111/nph.13584.
- 689 Simbaqueba, J., Catanzariti, A. M., González, C., and Jones, D. A. (2018). Evidence for horizontal  
690 gene transfer and separation of effector recognition from effector function revealed by analysis  
691 of effector genes shared between cape gooseberry- and tomato-infecting formae speciales of  
692 *Fusarium oxysporum*. *Mol. Plant Pathol.* 19, 2302–2318. doi:10.1111/mpp.12700.
- 693 Simbaqueba, J., Sánchez, P., Sanchez, E., Núñez Zarantes, V. M., Chacon, M. I., Barrero, L. S., et  
694 al. (2011). Development and characterization of microsatellite markers for the cape gooseberry  
695 *Physalis peruviana*. *PLoS One* 6. doi:10.1371/journal.pone.0026719.
- 696 Simons, G., Groenendijk, J., Wijbrandi, J., Reijans, M., Groenen, J., Diergaarde, P., et al. (1998).  
697 Dissection of the *Fusarium* I2 Gene Cluster in Tomato Reveals Six Homologs and One Active  
698 Gene Copy. *Plant Cell* 10, 1055–1068. doi:10.1105/tpc.10.6.1055.
- 699 Sperschneider, J., Dodds, P. N., Gardiner, D. M., Manners, J. M., Singh, K. B., and Taylor, J. M.  
700 (2015). Advances and Challenges in Computational Prediction of Effectors from Plant  
701 Pathogenic Fungi. *PLoS Pathog.* 11, 1–7. doi:10.1371/journal.ppat.1004806.
- 702 Sperschneider, J., Dodds, P. N., Gardiner, D. M., Singh, K. B., and Taylor, J. M. (2018). Improved  
703 prediction of fungal effector proteins from secretomes with EffectorP 2.0. *Mol. Plant Pathol.* 19,  
704 2094–2110. doi:10.1111/mpp.12682.
- 705 Stanke, M., and Morgenstern, B. (2005). AUGUSTUS: a web server for gene prediction in  
706 eukaryotes that allows user-defined constraints. *Nucleic Acids Res.* 33, W465–W467.  
707 doi:10.1093/nar/gki458.
- 708 Stergiopoulos, I., and de Wit, P. J. G. M. (2009). Fungal Effector Proteins. *Annu. Rev. Phytopathol.*  
709 47, 233–263. doi:10.1146/annurev.phyto.112408.132637.
- 710 Taylor, A., Armitage, A. D., Handy, C., Jackson, A. C., Hulin, M. T., Harrison, R. J., et al. (2019).  
711 Basal Rot of Narcissus: Understanding Pathogenicity in *Fusarium oxysporum* f. sp. *narcissi*.  
712 *Front. Microbiol.* 10, 1–17. doi:10.3389/fmicb.2019.02905.

- 713 Taylor, A., Vágány, V., Jackson, A. C., Harrison, R. J., Rainoni, A., and Clarkson, J. P. (2016).  
714 Identification of pathogenicity-related genes in *Fusarium oxysporum* f. sp. *cepae*. *Mol. Plant*  
715 *Pathol.* 17, 1032–1047. doi:10.1111/mpp.12346.
- 716 Thatcher, L. F., Gardiner, D. M., Kazan, K., and Manners, J. M. (2012). A highly conserved effector  
717 in *Fusarium oxysporum* is required for full virulence on *Arabidopsis*. *Mol. Plant-Microbe*  
718 *Interact.* 25, 180–190. doi:10.1094/MPMI-08-11-0212.
- 719 van Dam, P., de Sain, M., Ter Horst, A., van der Gragt, M., and Rep, M. (2017a). Use of  
720 Comparative Genomics-Based Markers for Discrimination of Host Specificity in *Fusarium*  
721 *oxysporum*. *Appl. Environ. Microbiol.* 84, e01868-17. doi:10.1128/AEM.01868-17.
- 722 van Dam, P., Fokkens, L., Ayukawa, Y., van der Gragt, M., Ter Horst, A., Brankovics, B., et al.  
723 (2017b). A mobile pathogenicity chromosome in *Fusarium oxysporum* for infection of multiple  
724 cucurbit species. *Sci. Rep.* 7, 9042. doi:10.1038/s41598-017-07995-y.
- 725 van Dam, P., Fokkens, L., Schmidt, S. M., Linmans, J. H. J., Corby Kistler, H., Ma, L. J., et al.  
726 (2016). Effector profiles distinguish formae speciales of *Fusarium oxysporum*. *Environ.*  
727 *Microbiol.* 18, 4087–4102. doi:10.1111/1462-2920.13445.
- 728 van Dam, P., and Rep, M. (2017). The Distribution of Miniature Impala Elements and SIX Genes in  
729 the *Fusarium* Genus is Suggestive of Horizontal Gene Transfer. *J. Mol. Evol.* 85, 14–25.  
730 doi:10.1007/s00239-017-9801-0.
- 731 Vlaardingerbroek, I., Beerens, B., Rose, L., Fokkens, L., Cornelissen, B. J. C., and Rep, M. (2016).  
732 Exchange of core chromosomes and horizontal transfer of lineage-specific chromosomes in  
733 *Fusarium oxysporum*. *Environ. Microbiol.* 18, 3702–3713. doi:10.1111/1462-2920.13281.
- 734 Williams, A. H., Sharma, M., Thatcher, L. F., Azam, S., Hane, J. K., Sperschneider, J., et al. (2016).  
735 Comparative genomics and prediction of conditionally dispensable sequences in legume-  
736 infecting *Fusarium oxysporum* formae speciales facilitates identification of candidate effectors.  
737 *BMC Genomics* 17. doi:10.1186/s12864-016-2486-8.
- 738 Yen, C.-Y., Chiu, C.-C., Chang, F.-R., Chen, J. Y.-F., Hwang, C.-C., Hseu, Y.-C., et al. (2010). 4β-  
739 Hydroxywithanolide E from *Physalis peruviana* (golden berry) inhibits growth of human lung  
740 cancer cells through DNA damage, apoptosis and G2/M arrest. *BMC Cancer* 10, 46.  
741 doi:10.1186/1471-2407-10-46.

- 742 Zerbino, D. R., and Birney, E. (2008). Velvet: algorithms for de novo short read assembly using de  
743 Bruijn graphs. *Genome Res.* 18, 821–829. doi:10.1101/gr.074492.107.
- 744 Zhang, Y. J., Zhang, S., Liu, X. Z., Wen, H. A., and Wang, M. (2010). A simple method of genomic  
745 DNA extraction suitable for analysis of bulk fungal strains. *Lett. Appl. Microbiol.* 51, 114–118.  
746 doi:10.1111/j.1472-765X.2010.02867.x.
- 747

***in planta* expression of *Foph* effectors at 4dpi**

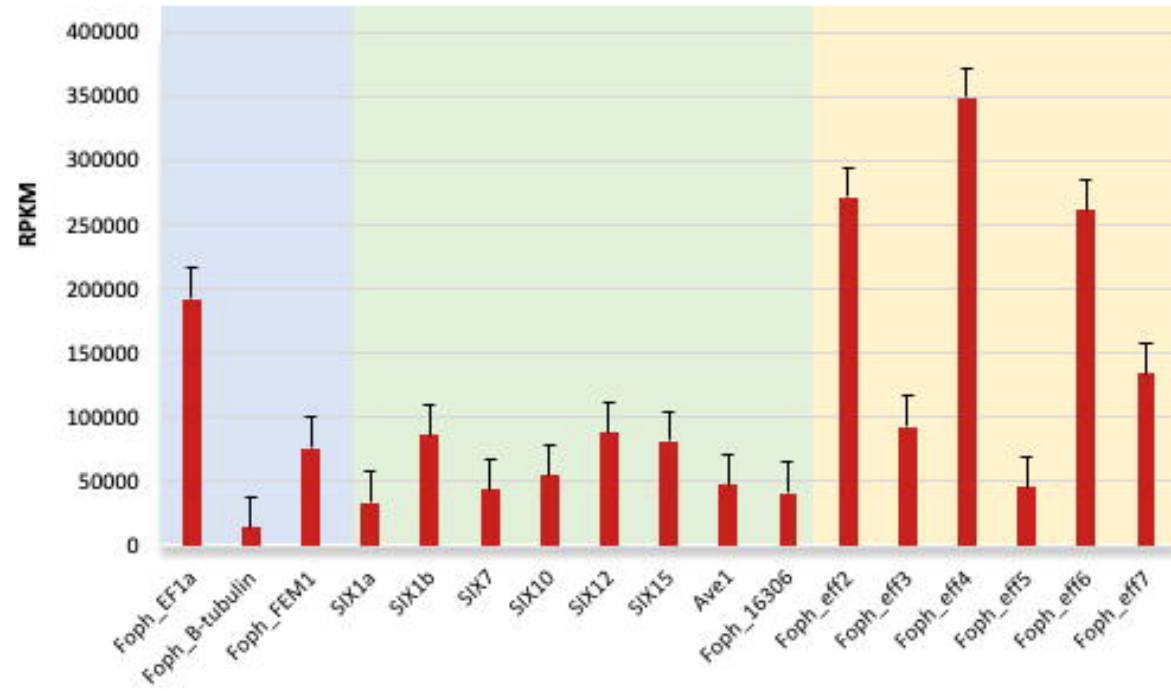

Tree scale: 0.001

posterior

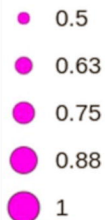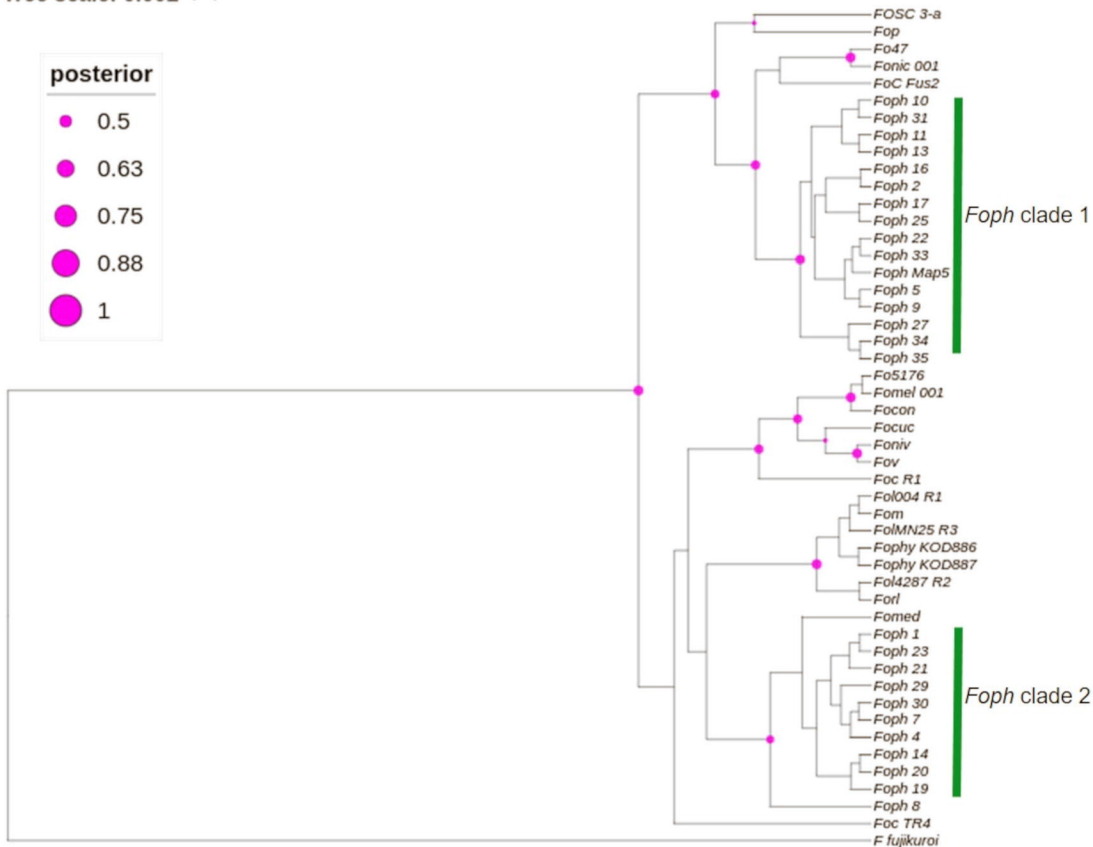

Source: https://www.biorxiv.org/content/10.1101/2020.08.10.235309v2.full.pdf
