# Supplementary material for: Novel effector genes revealed by the genomic analysis of the phytopathogenic fungus Fusarium oxysporum f. sp. physali (Foph) that infects cape gooseberry plants
Source: bioRxiv preprint, doi:10.1101/2020.08.10.235309, version 3 (2020-08-12)
Supplement: Supplementary Table 3 [file 235309_file06.docx]

**Table S3**. Primer sequences used in this study

| **Primer Name** | **Sequence** | **Region amplified** | **Amplicon size bp** |
| --- | --- | --- | --- |
| SIX13-F | CGAATCCTTCATCATCGACA | Foph-SIX13 | 1142 |
| SIX13-R | AGGGTCTTGAGTTCGTTGACA |
| g7767.t1-F | atgaagcctgtggccattct | Eff1 | 493 |
| g7767.t1-R | ctaggttgcgaggatcacg |
| g10813.t1-F | atgaggttctccctatcacaga | Eff2 | 491 |
| g10813.t1-R | ctacttgaaacagccacctga |
| g11758.t1-F | atgcgttctaccgctatctctc | Eff3 | 519 |
| g11758.t1-R | taatcataaagccggatttcca |
| g11759.t1-F | atgaagtcaatcactctccttgc | Eff4 | 604 |
| g11759.t1-R | gtcggccaagtccgtcag |
| g14220.t1-F | ttcctgactctggccctgac | Eff5 | 343 |
| g14220.t1-R | ttagttgcagctccaatacgg |
| g14434.t1-F | atggttaaacacatccaactgc | Eff6 | 384 |
| g14434.t1-R | cccataataaccccctccaa |
| ￼g14470.t1-F | gaagttatcttacgccagcgttatt | Eff7 | 252 |
| g14470.t1-R | tcactagccacacaaacgatac |
